# Supplementary material for: Structures of FEC-containing electrolytes and the stabilization mechanism at high voltage and elevated temperature
Source: Royal Society of Chemistry journal article supplement (doi:10.1039/c7cp08362a), 2018-01-01
Supplement: c7cp08362a1.pdf [file c7cp08362a1.pdf]

Supporting Information for:

## Structures of FEC-containing Electrolytes and Stabilization

### Mechanism at High Voltage and Elevated Temperature

Yamin Wang,<sup>†</sup> Debing Li,<sup>†</sup> Xiaoying Yu,<sup>†</sup> Chao Shang,<sup>‡</sup> Yingchun Liu,<sup>†</sup> and Qi Wang<sup>\*,†</sup>

<sup>†</sup> Department of Chemistry, Zhejiang University, Hangzhou 310027, People's Republic of China

<sup>‡</sup> King's Academy, Madaba, 16188, Jordan

\* Q. Wang. Fax: +86 571 87951895. E-mail: qiwang@zju.edu.cn

Table S1. Comparison of calculated density with the literature reported at 300 K.

| Entry (300K)                 | This work <sup>a</sup> |      |      | Reported (from SciFinder) |      |      |
|------------------------------|------------------------|------|------|---------------------------|------|------|
|                              | FEC                    | EC   | EMC  | FEC                       | EC   | EMC  |
| Density (g/cm <sup>3</sup> ) | 1.46                   | 1.34 | 1.05 | 1.45                      | 1.32 | 1.00 |

a: The densities in this work are obtained by simulating pure solvent system, each system contains 1000 molecules, simulation details are uniform with the mixed system. The densities of pure solvent are consistent with those in literature reported. And mixed densities for G2, E1, E2 are 1.23g/cm<sup>3</sup>, 1.25g/cm<sup>3</sup>, 1.22g/cm<sup>3</sup>, respectively, which are within a reasonable range of values. The force field parameters for Li<sup>+</sup> and PF<sub>6</sub><sup>-</sup> are obtained from the studies of Tenney et al.<sup>1</sup>

Table S2. Comparison of calculated self-diffusion coefficients with the literature reported at 300 K

| Species                      | Self-diffusion coefficients D (m <sup>2</sup> /s) |                                                          |
|------------------------------|---------------------------------------------------|----------------------------------------------------------|
|                              | This work <sup>a</sup> (system G2)                | Reported <sup>b</sup> (from Fig.2 in Ref. <sup>1</sup> ) |
| Li <sup>+</sup>              | 2.46×10 <sup>-11</sup>                            | 6.6×10 <sup>-11</sup>                                    |
| PF <sub>6</sub> <sup>-</sup> | 2.47×10 <sup>-11</sup>                            | 6.6×10 <sup>-11</sup>                                    |
| EC                           | 1.05×10 <sup>-10</sup>                            | 2.1×10 <sup>-10</sup>                                    |
| EMC or DMC                   | 1.08×10 <sup>-10</sup>                            | 2.4×10 <sup>-10</sup>                                    |

a: 1.2M LiPF<sub>6</sub> in EC / EMC. b: 1.0 M LiPF<sub>6</sub> in EC / DMC. Values for D are averages taken over the last 8 ns of 20 ns trajectories. Although the system G2 differs from the literature reported,<sup>1</sup> the corresponding Ds are in the same order of magnitude. When compared with experimental data (see Table 4 in ref.2, 1.0 M LiPF<sub>6</sub> in EC/DEC at 303K ), corresponding solvent Ds are in the same order magnitude, and ion Ds is lower than experimental data. However, based on classical Stokes–Einstein

Equation formula,  $D_s$  become smaller as the temperature decreases (300K in this work vs. 303K in experiment). And previous researches have reported that ion  $D_s$  decrease with the increasing ion concentration.<sup>3, 4</sup> (1.2M in this work vs. 1.0M in experiment). Considering the differences of temperature and concentration. The  $D$  values of ion in this work should be smaller than experiment data in ref.2. In other words, Our simulation results of self-diffusion coefficients are in good agreement with the previous simulation and experimental data.

**RDFs.** The primary peak positions of RDF are consistent with previous results calculated by molecular dynamics (MD),<sup>1, 5, 6</sup> *ab initio* molecular dynamics (AIMD)<sup>5</sup> and experimental data measured by Time-of-flight neutron diffraction.<sup>7</sup> Good agreements are found compared with those in the literature for Li–O,<sup>1, 5, 8</sup> Li–P,<sup>1, 6, 7</sup> and Li–Li<sup>1</sup> respectively, showing that conventional MD are accurate enough to describe correctly the short-range microscopic structure of the system, it is consistent with the reported conclusion that microscopic structure can be modeled well by conventional MD.<sup>1, 9-12</sup>

Table S3. Coordination number  $N$  of each solvent within the first coordination shell of  $\text{Li}^+$  ions for systems G2, E1 and E2 at different temperatures.

| Field strength | G2    |        | E1     |       |        | E2     |        |
|----------------|-------|--------|--------|-------|--------|--------|--------|
|                | Li–EC | Li–EMC | Li–FEC | Li–EC | Li–EMC | Li–FEC | Li–EMC |
| 250 K          | 1.31  | 2.33   | 0.41   | 0.57  | 2.25   | 0.71   | 2.41   |
| 300 K          | 0.87  | 2.05   | 0.15   | 0.34  | 2.11   | 0.26   | 2.13   |
| 330 K          | 0.79  | 1.78   | 0.10   | 0.26  | 1.89   | 0.19   | 2.00   |

As an extension, electric fields are considered during the analysis of structures of electrolytes. Similar to the temperature, Figure S1 and Table S4 show the changes in radial distribution function  $g(r)$  and coordination number ( $N$ ) with the increase of external electric field. Figure S1 shows the short-range order and strong solvation effects of ions in the structures of electrolytes. It also shows that the position of the primary peaks and first valley of the RDF do not change with the electric field, even in strong electric field ( $E = 1000 \text{ V}/\mu\text{m}$ ). And the primary Li–O peaks at approximately 0.21 nm is the highest and  $N_{\text{Li-O}} = 3.40$ , and the others (Li–P, Li–Li, and P–O) display significantly lower

for strong electric fields. It suggests that a strong electric field leads to the enhancement of  $\text{Li}^+$  solvation (Li-O coordination number) but depression for Li-P, Li-Li, and P-O. A slight lower total  $N$  indicates that the effects of strong electric field on decreasing of Li-P, Li-Li and P-O are greater than increasing of Li-O. But for weak electric fields ( $0 < E < 1.0 \text{ V}/\mu\text{m}$ ), no significant changes in  $g(r)$  and  $N$  were observed in external electric fields. In summary, the external electric field does not exhibit noticeable effects on ion solvations and electrolyte structures except for an extremely strong electric field.

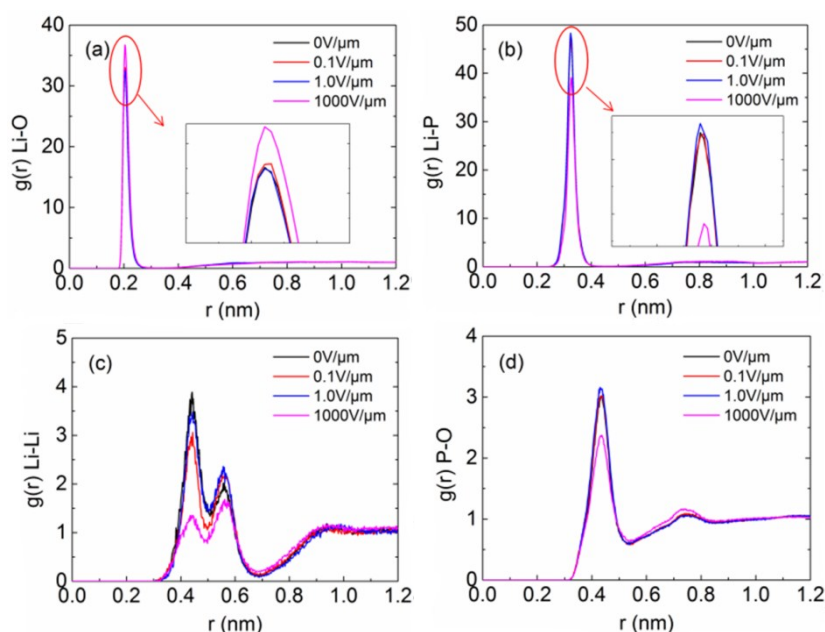

Figure S1. Radial distribution function  $g(r)$  for  $\text{Li}^+$  with solvent carbonyl oxygen atom (a. Li-O, solvent including EC and EMC),  $\text{PF}_6^-$  (b. Li-P), other  $\text{Li}^+$  (c. Li-Li), and  $\text{PF}_6^-$  with solvent carbonyl oxygen (d. P-O) for system G2 at different external electric fields.

Table S4. Coordination number  $N$  of species within the first coordination shell of ions for system G2 at different external electric fields and  $T = 300 \text{ K}$ .

| Field strength              | Li-O <sup>a</sup> | Li-P | Li-Li | P-O  | total |
|-----------------------------|-------------------|------|-------|------|-------|
| 0 $\text{V}/\mu\text{m}$    | 2.98              | 1.61 | 0.49  | 4.35 | 9.43  |
| 0.1 $\text{V}/\mu\text{m}$  | 2.99              | 1.58 | 0.38  | 4.51 | 9.46  |
| 1.0 $\text{V}/\mu\text{m}$  | 2.80              | 1.63 | 0.44  | 4.62 | 9.49  |
| 1000 $\text{V}/\mu\text{m}$ | 3.40              | 1.31 | 0.22  | 3.86 | 8.79  |

a: See Table S6 (for system G2) for  $N$  of each solvent within the first coordination shell of  $\text{Li}^+$  ions.

Table S5. Coordination number  $N$  of species within the first coordination shell of ions for systems E1 and E2 at different external electric fields and  $T = 300$  K

| Field strength        | E1                |      |       |      | E2   |      |       |      |
|-----------------------|-------------------|------|-------|------|------|------|-------|------|
|                       | Li-O <sup>a</sup> | Li-P | Li-Li | P-O  | Li-O | Li-P | Li-Li | P-O  |
| 0 V/ $\mu\text{m}$    | 2.60              | 1.85 | 0.69  | 4.73 | 2.39 | 1.97 | 0.85  | 4.86 |
| 0.1 V/ $\mu\text{m}$  | 2.72              | 1.75 | 0.56  | 4.63 | 2.51 | 1.90 | 0.68  | 4.97 |
| 1.0 V/ $\mu\text{m}$  | 2.54              | 1.88 | 0.64  | 4.84 | 2.46 | 1.94 | 0.77  | 4.89 |
| 1000 V/ $\mu\text{m}$ | 3.19              | 1.45 | 0.30  | 4.12 | 3.08 | 1.50 | 0.33  | 4.40 |

a: See Table S6 (for systems E1 and E2) for  $N$  of each solvent within the first coordination shell of  $\text{Li}^+$  ions.

Table S6. Coordination number  $N$  of each solvent within the first coordination shell of  $\text{Li}^+$  ions for systems G2, E1 and E2 at different external electric fields and  $T = 300$  K.

| Field strength        | G2    |        | E1     |       |        | E2     |        |
|-----------------------|-------|--------|--------|-------|--------|--------|--------|
|                       | Li-EC | Li-EMC | Li-FEC | Li-EC | Li-EMC | Li-FEC | Li-EMC |
| 0 V/ $\mu\text{m}$    | 0.92  | 2.06   | 0.15   | 0.34  | 2.11   | 0.26   | 2.13   |
| 0.1 V/ $\mu\text{m}$  | 0.87  | 2.12   | 0.14   | 0.39  | 2.19   | 0.26   | 2.25   |
| 1 V/ $\mu\text{m}$    | 0.78  | 2.02   | 0.12   | 0.32  | 2.10   | 0.24   | 2.22   |
| 1000 V/ $\mu\text{m}$ | 1.31  | 2.09   | 0.43   | 0.54  | 2.22   | 0.73   | 2.35   |

### Key Force Field parameters

Some key Force field parameters originally built via Antechamber using GAFF (Generalized Amber Force Field) by linuxuser. The force field parameters for  $\text{Li}^+$  and  $\text{PF}_6^-$  are taken from the studies of Tenney et al.<sup>1</sup>

Table S7. Nonbonded Lennard-Jones

| Atom      | $\sigma$ (Å) | $\epsilon$ (kcal mol <sup>-1</sup> ) |
|-----------|--------------|--------------------------------------|
| C (sp3)   | 3.400        | 0.458                                |
| C (sp2)   | 3.400        | 0.360                                |
| H         | 2.471        | 0.066                                |
| H (H-CHF) | 2.293        | 0.066                                |

|                        |       |       |
|------------------------|-------|-------|
| H (CH <sub>3</sub> -O) | 2.650 | 0.066 |
| O=                     | 2.960 | 0.879 |
| O-                     | 3.000 | 0.711 |
| F                      | 3.118 | 0.255 |

Energy-minimized *ab initio* structure and atom charge

! ATOM:

!! index (int): atom index

!! name (str): atom name (required)

!! type (str): atomtype name

!! charge (float, e): partial atomic charge

!! x (float, angstrom): atom coordinate

!! y (float, angstrom): atom coordinate

!! z (float, angstrom): atom coordinate

MOLECULE EC

| index | name | type | charge   | x         | y         | z         | ! 10 |
|-------|------|------|----------|-----------|-----------|-----------|------|
| 1     | C1   | c    | 0.84495  | 0.852909  | -0.000012 | -0.000195 |      |
| 2     | O1   | os   | -0.37347 | 0.073901  | 1.114400  | -0.099196 |      |
| 3     | O2   | os   | -0.37347 | 0.073873  | -1.114396 | 0.099123  |      |
| 4     | O3   | o    | -0.54569 | 2.047751  | -0.000011 | 0.000122  |      |
| 5     | C2   | c3   | 0.08932  | -1.305804 | 0.758294  | 0.110486  |      |
| 6     | H1   | h1   | 0.06726  | -1.586511 | 1.039717  | 1.134701  |      |
| 7     | H2   | h1   | 0.06726  | -1.919381 | 1.310006  | -0.609218 |      |
| 8     | C3   | c3   | 0.08932  | -1.305820 | -0.758281 | -0.110403 |      |
| 9     | H3   | h1   | 0.06726  | -1.586677 | -1.039710 | -1.134579 |      |
| 10    | H4   | h1   | 0.06726  | -1.919342 | -1.309963 | 0.609376  |      |

MOLECULE EMC

| index | name | type | charge | x | y | z | ! 15 |
|-------|------|------|--------|---|---|---|------|
|-------|------|------|--------|---|---|---|------|

|    |    |    |          |           |           |           |
|----|----|----|----------|-----------|-----------|-----------|
| 1  | C1 | c  | 1.00191  | -0.544561 | 0.164360  | 0.000006  |
| 2  | O1 | o  | -0.61727 | -0.734971 | 1.362517  | -0.000056 |
| 3  | O2 | os | -0.55116 | 0.647234  | -0.447869 | 0.000098  |
| 4  | O3 | os | -0.39105 | -1.497690 | -0.781881 | 0.000025  |
| 5  | C2 | c3 | 0.50520  | 1.799892  | 0.434646  | 0.000105  |
| 6  | H1 | h1 | -0.05682 | 1.747278  | 1.076836  | -0.888573 |
| 7  | H2 | h1 | -0.05682 | 1.747440  | 1.076592  | 0.888973  |
| 8  | C3 | c3 | -0.00991 | -2.848210 | -0.281121 | -0.000041 |
| 9  | H3 | h1 | 0.07455  | -3.031369 | 0.325729  | -0.894888 |
| 10 | H4 | h1 | 0.07455  | -3.482875 | -1.171546 | -0.000290 |
| 11 | H5 | h1 | 0.07455  | -3.031580 | 0.325361  | 0.895016  |
| 12 | C4 | c3 | -0.25170 | 3.037307  | -0.439960 | -0.000115 |
| 13 | H6 | hc | 0.06799  | 3.932394  | 0.197185  | -0.000081 |
| 14 | H7 | hc | 0.06799  | 3.067841  | -1.080054 | 0.891295  |
| 15 | H8 | hc | 0.06799  | 3.067716  | -1.079786 | -0.891721 |

#### MOLECULE FEC

| index | name | type | charge   | x         | y         | z         | ! 10 |
|-------|------|------|----------|-----------|-----------|-----------|------|
| 1     | C1   | c    | 0.81284  | -1.130822 | -0.128270 | -0.016797 |      |
| 2     | O1   | os   | -0.33427 | -0.673759 | 1.123608  | -0.266342 |      |
| 3     | O2   | os   | -0.35567 | -0.111290 | -0.900845 | 0.509053  |      |
| 4     | O3   | o    | -0.50754 | -2.240637 | -0.517396 | -0.200401 |      |
| 5     | C2   | c3   | 0.00724  | 0.687684  | 1.242117  | 0.178195  |      |
| 6     | H1   | h1   | 0.09917  | 1.285442  | 1.705088  | -0.612946 |      |
| 7     | H2   | h1   | 0.09917  | 0.714140  | 1.849302  | 1.092247  |      |
| 8     | C3   | c3   | 0.33833  | 1.102554  | -0.206326 | 0.435328  |      |
| 9     | H3   | h2   | 0.07599  | 1.688753  | -0.393809 | 1.340610  |      |
| 10    | F1   | f    | -0.23526 | 1.840074  | -0.694294 | -0.637638 |      |

#### Example of Gromacs simulation Script

Title = OPLS Lysozyme MD simulation

; Run parameters

integrator = md ;  
nsteps = 25000000 ;  
dt = 0.001 ;

; Output control

nstxout = 5000 ;  
nstvout = 5000 ;  
nstenergy = 5000 ;  
nstlog = 5000 ;  
nstxtcout = 5000 ;

; Bond parameters

continuation = yes ;  
;constraint\_algorithm = lincs ;  
;constraints = all-bonds ;

constrained

;lincs\_iter = 1 ;  
;lincs\_order = 4 ;

; Neighborsearching

;cutoff-scheme = Verlet  
ns\_type = grid ;  
nstlist = 10 ;  
rcoulomb = 1.0 ;  
rvdw = 1.0 ;

; Electrostatics

coulombtype = PME ;  
pme\_order = 4 ;  
fourierspacing = 0.16 ;

; Temperature coupling is on

tcoupl = Nose-Hoover ;  
tc-grps = EMC ECX LIX PF6 ;  
tau\_t = 0.1 0.1 0.1 0.1 ;  
ref\_t = 300 300 300 300 ;

; Pressure coupling is on

pcoupl = Parrinello-Rahman ;  
pcoupltype = isotropic ;

```

tau_p          = 2.0          ;
ref_p          = 1.0          ;
compressibility = 4.5e-5      ;

; Periodic boundary conditions
pbc           = xyz          ;

; Dispersion correction
DispCorr      = EnerPres    ;

; Velocity generation
gen_vel       = no          ;

; Electric fields
; Format is number of terms (int) and for all terms an amplitude (real)
; and a phase angle (real)
E-x           =
E-xt          =
E-y           =
E-yt          =
E-z           =
E-zt          =

```

## References:

- 1 C. M. Tenney and R. T. Cygan, *Journal of Physical Chemistry C*, 2013, **117**, 24673-24684.
- 2 K. Hayamizu, *J. Chem. Eng. Data*, 2012, **57**, 2012-2017.
- 3 M. Jardat, S. Durand-Vidal, P. Turq and G. R. Kneller, *J. Mol. Liq.*, 2000, **85**, 45-55.
- 4 P. Turq, F. Lantelme, Y. Roumegous and M. Chemla, *J. Chim. Phys. Phys.-Chim. Biol.*, 1971, **3**, 527-531.
- 5 J. M. Yu, P. B. Balbuena, J. L. Budzien and K. Leung, *Journal of the Electrochemical Society*, 2011, **158**, 400-410.
- 6 O. Borodin and G. D. Smith, *JOURNAL OF PHYSICAL CHEMISTRY B*, 2009, **113**, 1763-1776.
- 7 Y. Kameda, Y. Umebayashi, M. Takeuchi, M. A. Wahab, S. Fukuda, S. Ishiguro, M. Sasaki, Y. Amo and T. Usuki, *Journal of Physical Chemistry B*, 2007, **111**, 6104-6109.
- 8 P. Ganesh, D. Jiang and P. R. C. Kent, *Journal of Physical Chemistry B*, 2011, **115**, 3085-3090.
- 9 J. M. Vicent-Luna, J. M. Ortiz-Roldan, S. Hamad, R. Tena-Zaera, S. Calero and J. A. Anta, *ChemPhysChem*, 2016, **17**, 2473-2481.
- 10 N. Takenaka, Y. Suzuki, H. Sakai and M. Nagaoka, *Journal of Physical Chemistry C*, 2014, **118**, 10874-10882.
- 11 J. N. Canongia Lopes, J. Deschamps and A. A. H. Pádua, *Journal of Physical Chemistry B*, 2004, **108**, 2038-2047.
- 12 X. Liu, S. Zhang, G. Zhou, G. Wu, X. Yuan and X. Yao, *Journal of Physical Chemistry B*, 2006, **110**, 12062-12071.
